# Supplementary material
Source: PubMed Central journal article supplement (PMC165979)
Supplement: nar_31_14_4138__1.pdf [file nar_31_14_4138__1.pdf]

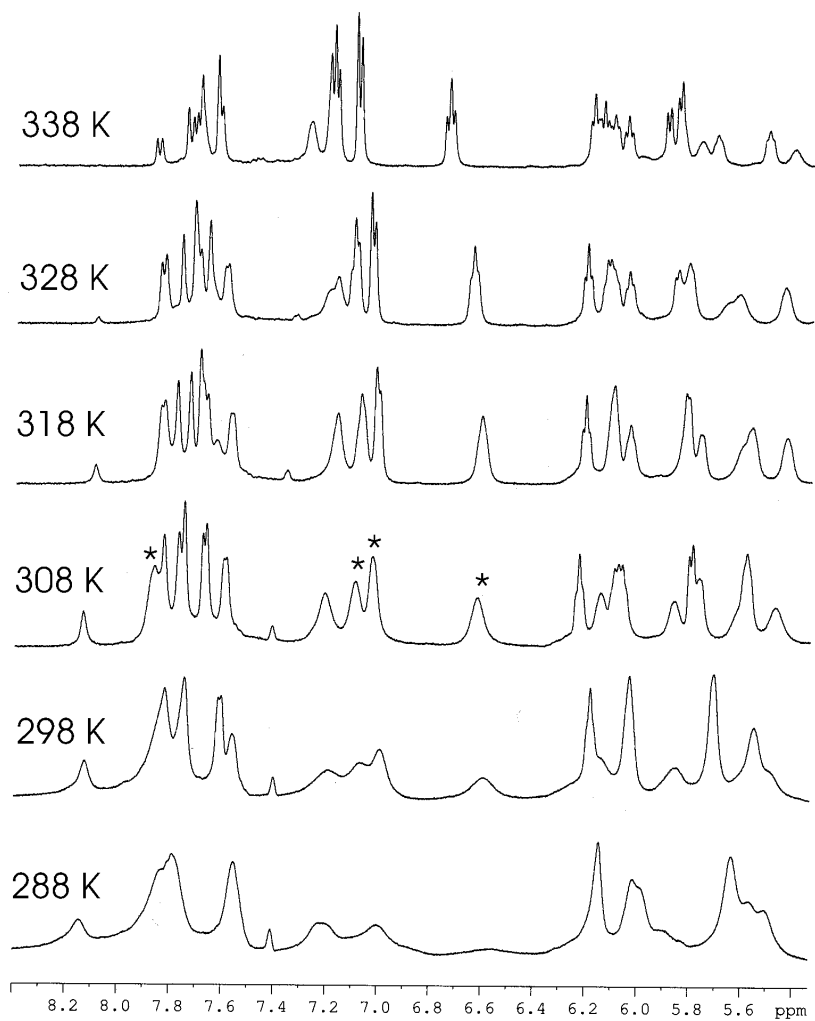

**Figure S1.** Variable-temperature <sup>1</sup>H NMR spectra (500 MHz, 99.996 % D<sub>2</sub>O, 10 mM phosphate buffer, 100 mM NaCl, pH\* 7.0) of the 1:1 DNA-ligand complex, [d(GGACGTCC)<sub>2</sub>ACRAMTU]. The asterisks indicate aromatic proton signals of acridine.
