# Supplementary material
Source: PubMed Central journal article supplement (PMC165979)
Supplement: nar_31_14_4138__2.pdf [file nar_31_14_4138__2.pdf]

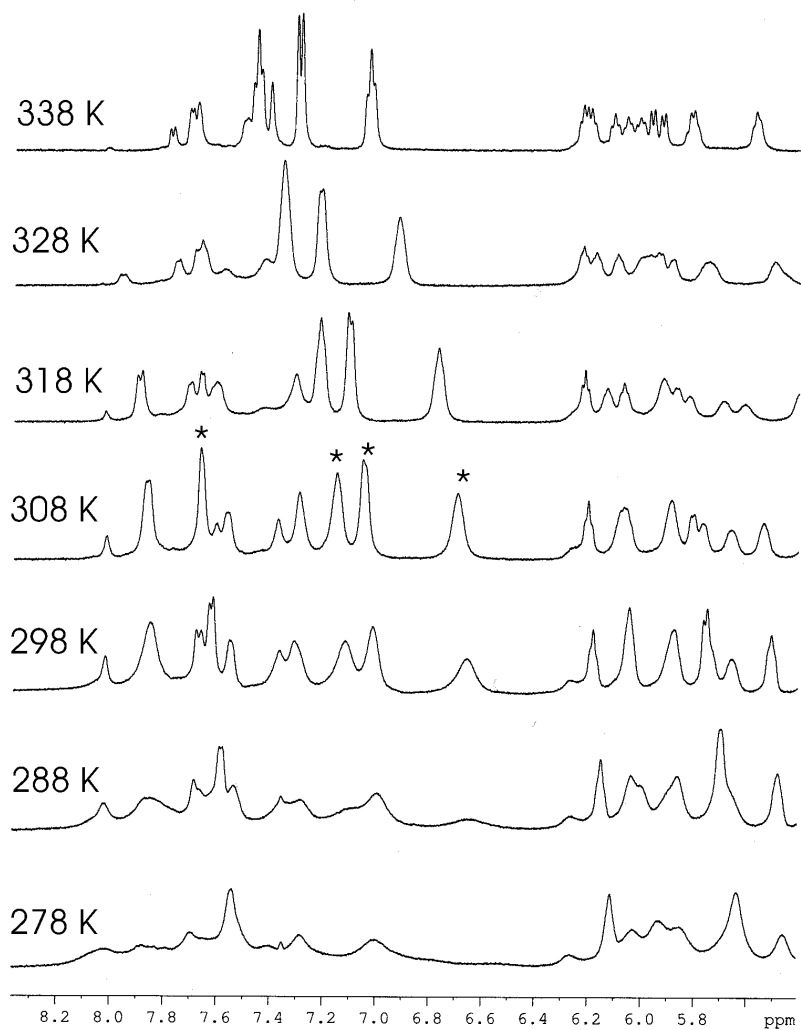

**Figure S2.** Variable-temperature <sup>1</sup>H NMR spectra (500 MHz, 99.996 % D<sub>2</sub>O, 10 mM phosphate buffer, 100 mM NaCl, pH\* 7.0) of the 1:2 DNA–ligand complex, [d(GGAGCTCC)<sub>2</sub>(ACRAMTU)<sub>2</sub>]. The asterisks indicate aromatic proton signals of acridine.
