# Supplementary material
Source: PubMed Central journal article supplement (PMC165979)
Supplement: nar_31_14_4138__3.pdf [file nar_31_14_4138__3.pdf]

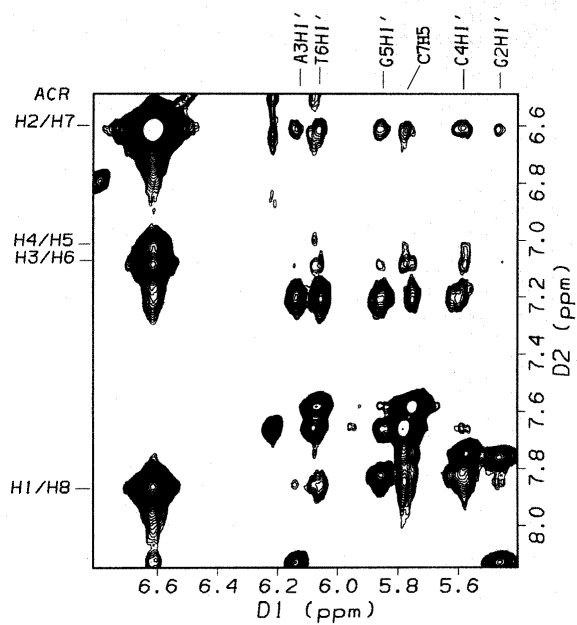

**Figure S3.** Section of the 2-D NOESY spectrum (500 MHz,  $\tau_m = 400$  ms, 308 K, 99.996 % D<sub>2</sub>O, 10 mM phosphate buffer, 100 mM NaCl, pH\* = 7.0) of the 1:1 DNA–drug complex [d(GGACGTCC)<sub>2</sub>ACRAMTU] showing NOEs between H1' sugar protons and the acridine chromophore.
