# Supplementary material
Source: PubMed Central journal article supplement (PMC165979)
Supplement: nar_31_14_4138__4.pdf [file nar_31_14_4138__4.pdf]

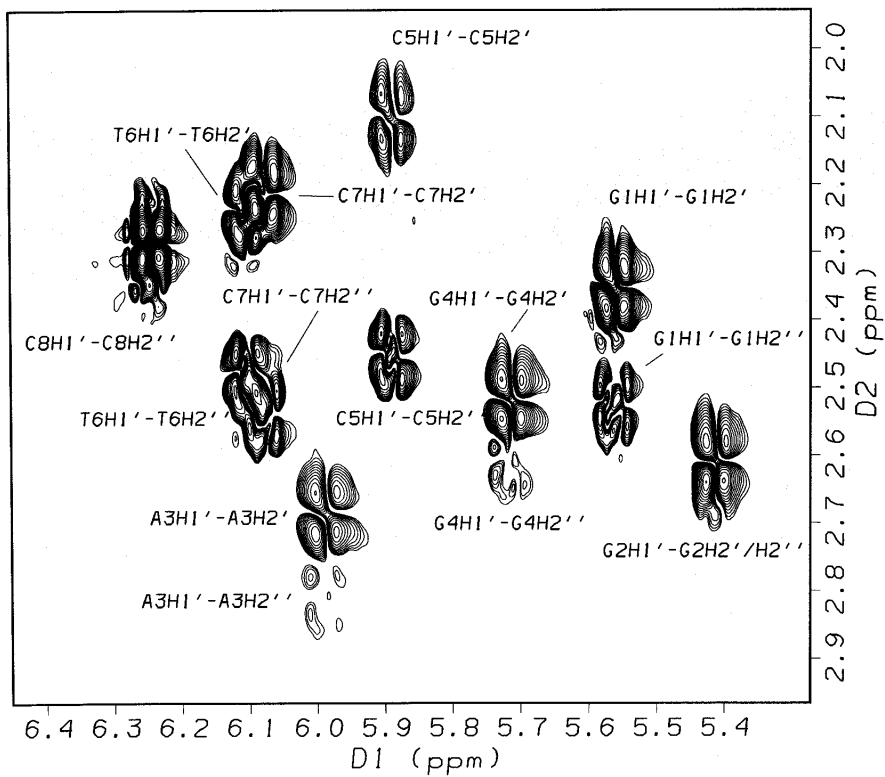

**Figure S4.** H1'-H2'/H2'' region of the dqf-COSY spectrum (500 MHz, 99.996 % D<sub>2</sub>O, 10 mM phosphate buffer, 100 mM NaCl, pH\* 7.0, *T* = 308 K) of the 1:2 DNA-ligand complex, [d(GGAGCTCC)<sub>2</sub>(ACRAMTU)<sub>2</sub>].
