# Supplementary material
Source: PubMed Central journal article supplement (PMC165979)
Supplement: nar_31_14_4138__5.pdf [file nar_31_14_4138__5.pdf]

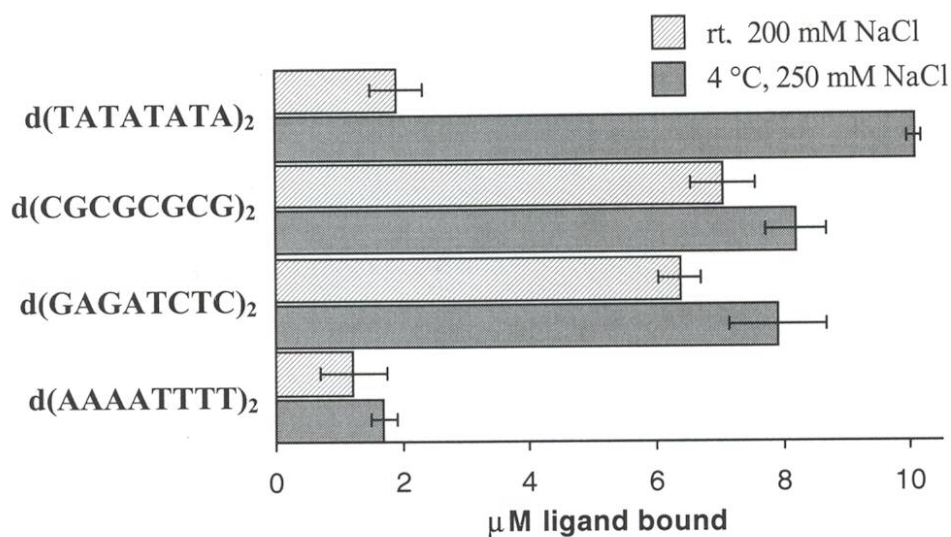

**Figure S5.** Comparison of the competition dialysis assays for ACRAMTU in four palindromic sequences performed at room temperature and 277 K. Conditions: 8 mM phosphate, pH 7.0, 1 mM EDTA, [DNA(base pairs)] = 480  $\mu$ M, [ACRAMTU] in dialysate solution = 5  $\mu$ M. Dialysis experiments were carried out in a 28-well microdialyzer with a 1000-Da molecular weight cut-off membrane for 60 h. The amount of drug bound to each sequence was established spectrophotometrically. Bars give averages of four independent experiments.
