# Supplementary material
Source: PubMed Central journal article supplement (PMC165979)
Supplement: nar_31_14_4138__6.pdf [file nar_31_14_4138__6.pdf]

**Table S1.**  $^1\text{H}$  NMR Chemical Shift Assignments for the 1:1 DNA–Drug Complex  
[d(GGACGTCC)<sub>2</sub>ACRAMTU]<sup>a</sup>

| residue | H6/H8                        | H2/H5/<br>CH <sub>3</sub> | H1'             | H2'             | H2''            | H3'             | H4'               | H5<br>H5''                   |
|---------|------------------------------|---------------------------|-----------------|-----------------|-----------------|-----------------|-------------------|------------------------------|
| G1      | 7.75<br>(-0.08) <sup>b</sup> |                           | 5.57<br>(-0.09) | 2.37<br>(-0.09) | 2.54<br>(-0.07) | 4.79<br>(-0.03) | n.a. <sup>c</sup> | 3.66 (-0.01)<br>3.56 (-0.01) |
| G2      | 7.76<br>(-0.09)              |                           | 5.45<br>(-0.13) | 2.63<br>(-0.08) | 2.63<br>(-0.17) | 4.98<br>(-0.05) | 4.33<br>(-0.05)   | 4.11 (-0.04)<br>4.04 (-0.05) |
| A3      | 8.13<br>(-0.08)              | 7.42<br>(-0.50)           | 6.13<br>(-0.14) | 2.67<br>(-0.05) | 2.81<br>(-0.12) | 5.03<br>(-0.05) | 4.44<br>(-0.05)   | 4.21 (-0.05)<br>4.19 (-0.02) |
| C4      | 7.19<br>(-0.04)              | 5.22<br>(-0.02)           | 5.60<br>(-0.04) | 2.05<br>(0.03)  | 2.31<br>(-0.07) | 4.81<br>(-0.03) | n. a.             | n. a.<br>n. a.               |
| G5      | 7.82<br>(-0.01)              |                           | 5.86<br>(-0.13) | 2.63<br>(0.00)  | 2.70<br>(-0.09) | 4.96<br>(0.00)  | 4.39<br>(0.00)    | 4.12 (-0.03)<br>4.01 (-0.09) |
| T6      | 7.21<br>(-0.09)              | 1.42<br>(0.00)            | 6.05<br>(-0.02) | 2.18<br>(0.01)  | 2.51<br>(-0.02) | 4.88<br>(-0.01) | 4.23<br>(-0.02)   | 4.21 (-0.05)<br>4.21 (0.01)  |
| C7      | 7.57<br>(-0.03)              | 5.74<br>(0.00)            | 6.07<br>(-0.03) | 2.48<br>(-0.24) | 2.21<br>(-0.28) | 4.84<br>(0.00)  | 4.19<br>(0.01)    | 4.11 (0.05)<br>4.04 (0.02)   |
| C8      | 7.64<br>(-0.01)              | 5.76<br>(0.01)            | 6.21<br>(-0.05) | 2.28<br>(-0.02) | n. a.           | 4.55<br>(-0.02) | 4.15<br>(0.09)    | n. a.<br>4.05 (0.00)         |
| ACR     | H1/H8                        | H2/H7                     | H3/H6           | H4/H5           | H9              | H10             | H11               | H12                          |
|         | 7.86<br>(-0.54) <sup>b</sup> | 6.61<br>(-0.95)           | 7.08<br>(-0.87) | 7.01<br>(-0.75) | 4.15<br>(-0.29) | 4.03<br>(-0.35) | 3.14<br>(0.26)    | 3.12<br>(0.27)               |

<sup>a</sup> 500 MHz, D<sub>2</sub>O, 308 K, pH\* 7.0; shifts are relative to DSS. <sup>b</sup> Numbers in parentheses are  $\Delta\delta = \delta_{\text{adduct}} - \delta_{\text{free DNA/free ACRAMTU}}$  (ppm). <sup>c</sup> Not assigned due to signal overlap.
