# Supplementary material
Source: PubMed Central journal article supplement (PMC165979)
Supplement: nar_31_14_4138__7.pdf [file nar_31_14_4138__7.pdf]

**Table S2.**  $^1\text{H}$  NMR Chemical Shift Assignments for the 1:2 DNA–Drug Complex  
[d(GGAGCTCC)<sub>2</sub>(ACRAMTU)<sub>2</sub>]<sup>a</sup>

| residue | H6/H8                        | H2/H5/<br>CH <sub>3</sub> | H1'             | H2'             | H2''            | H3'             | H4'              | H5<br>H5''                        |
|---------|------------------------------|---------------------------|-----------------|-----------------|-----------------|-----------------|------------------|-----------------------------------|
| G1      | 7.71<br>(-0.10)              |                           | 5.54<br>(-0.10) | 2.33<br>(-0.01) | 2.51<br>(0.01)  | 4.78<br>(-0.03) | 4.14<br>(-0.02)  | 3.68 (0.02)<br>3.58 (0.08)        |
| G2      | 7.69<br>(-0.18)              |                           | 5.38<br>(-0.12) | 2.57<br>(-0.13) | 2.57<br>(-0.21) | 4.96<br>(-0.05) | 4.31<br>(-0.03)  | 4.10 (-0.05)<br>4.03 (-0.09)      |
| A3      | 8.05<br>(-0.09)              | 7.39<br>(-0.42)           | 5.91<br>(-0.21) | 2.57<br>(-0.15) | 2.75<br>(-0.18) | 5.04<br>(-0.05) | 4.40<br>(-0.06)  | 4.22 (0.00)<br>4.17 (0.01)        |
| G4      | 7.64<br>(-0.01)              |                           | 5.69<br>(-0.10) | 2.51<br>(0.07)  | 2.61<br>(-0.13) | 4.94<br>(-0.03) | 4.39<br>(-0.03)  | n.a. <sup>c</sup><br>4.21 (-0.03) |
| C5      | 7.32<br>(-0.05)              | 5.23<br>(0.01)            | 5.90<br>(-0.01) | 2.12<br>(0.02)  | 2.43<br>(-0.09) | 4.80<br>(0.11)  | 4.22<br>(-0.09)  | n. a.<br>n. a.                    |
| T6      | 7.34<br>(-0.17)              | 1.66<br>(0.04)            | 6.07<br>(-0.05) | 2.23<br>(-0.04) | 2.53<br>(-0.03) | 4.85<br>(-0.05) | 4.22<br>(-0.00)  | 4.15 (-0.08)<br>4.04 (-0.08)      |
| C7      | 7.76<br>(0.12)               | 5.76<br>(-0.05)           | 6.07<br>(-0.07) | 2.23<br>(-0.00) | 2.51<br>(-0.01) | 4.87<br>(-0.01) | 4.22<br>(-0.03)  | 4.15 (-0.01)<br>4.08 (-0.04)      |
| C8      | 7.65<br>(-0.10)              | 5.78<br>(-0.12)           | 6.21<br>(-0.07) | 2.49<br>(0.00)  | 2.31<br>(-0.03) | 4.57<br>(-0.00) | 4.180<br>(-0.02) | n. a.<br>4.07 (-0.01)             |
| ACR     | H1/H8                        | H2/H7                     | H3/H6           | H4/H5           | H9              | H10             | H11              | H12                               |
|         | 7.88<br>(-0.52) <sup>b</sup> | 6.68<br>(-0.87)           | 7.15<br>(-0.80) | 7.04<br>(-0.72) | 4.14<br>(-0.30) | 4.04<br>(-0.34) | 3.13<br>(0.25)   | 3.09<br>(0.24)                    |

<sup>a</sup> 500 MHz, D<sub>2</sub>O, 308 K, pH\* 7.0; shifts are relative to DSS. The noticeable upfield shifts for G1 and C8 base protons is probably caused by the slight excess of drug stacking to the ends of the duplex. <sup>b</sup> Numbers in parentheses are  $\Delta\delta = \delta_{\text{adduct}} - \delta_{\text{free DNA/free ACRAMTU}}$  (ppm). <sup>c</sup> Not assigned due to signal overlap.
