# Supplementary material
Source: PubMed Central journal article supplement (PMC165979)
Supplement: nar_31_14_4138__8.pdf [file nar_31_14_4138__8.pdf]

**Table S3.**  $^1\text{H}$  NMR Chemical Shift Assignments for the 1:1 DNA–Drug Complex [d(GGTACC)<sub>2</sub>ACRAMTU]<sup>a</sup>

| residue | H6/H8                        | H2/H5/<br>CH <sub>3</sub> | H1'             | H2'             | H2''            | H3'             | H4'            | H5'<br>H5''                |
|---------|------------------------------|---------------------------|-----------------|-----------------|-----------------|-----------------|----------------|----------------------------|
| G1      | 7.74                         |                           | 5.64            | 2.38            | 2.38            | 4.76            | 4.13           | 3.65<br>3.65               |
| G2      | 7.80                         |                           | 5.89            | 2.66            | 2.62            | 4.95            | 4.36           | 4.10<br>4.07               |
| T3      | 7.21                         | 1.49                      | 5.77            | 2.09            | 2.35            | 4.84            | 4.26           | n. a. <sup>b</sup><br>4.14 |
| A4      | 8.22                         | 7.51                      | 6.16            | 2.73            | 2.81            | 4.98            | 4.41           | n. a.<br>4.19              |
| C5      | 7.37                         | 5.40                      | 5.97            | 2.08            | 2.40            | 4.75            | 4.27           | 4.19<br>4.17               |
| C6      | 7.62                         | 5.73                      | 6.19            | 2.25            | 2.56            | 4.50            | 4.11           | 4.13<br>4.03               |
| ACR     | H1/H8                        | H2/H7                     | H3/H6           | H4/H5           | H9              | H10             | H11            | H12                        |
|         | 7.86<br>(-0.54) <sup>c</sup> | 6.61<br>(-0.94)           | 7.09<br>(-0.87) | 7.00<br>(-0.75) | 4.10<br>(-0.34) | 4.03<br>(-0.35) | 3.09<br>(0.21) | 3.09<br>(0.24)             |

<sup>a</sup> 500 MHz, D<sub>2</sub>O, 303 K, pH\* 7.0; shifts are relative to DSS. <sup>b</sup> Not assigned due to signal overlap.

<sup>c</sup> Numbers in parentheses are  $\Delta\delta = \delta_{\text{adduct}} - \delta_{\text{free ACRAMTU}}$  (ppm). At 303 K the free duplex was partially melted, and  $\Delta\delta$  values are meaningless and are not given.
