# Supplementary material
Source: PubMed Central journal article supplement (PMC165979)
Supplement: nar_31_14_4138__9.pdf [file nar_31_14_4138__9.pdf]

**Table S4.** Force Field Parameters Added to the AMBER Parameter Set (Version 1.6, 21-May-96) and Gasteiger-Marsili Charges for ACRAMTU.

| <b>Atom Types</b> |         |                                                                               |
|-------------------|---------|-------------------------------------------------------------------------------|
| identifier        | element | connectivity                                                                  |
| CZ                | carbon  | sp <sup>2</sup> hybridized thiourea carbon attached to sp <sup>2</sup> sulfur |
| ST                | sulfur  | sp <sup>2</sup> hybridized thiourea sulfur attached to sp <sup>2</sup> carbon |

| <b>Bond Stretch Deformation</b> |           |                                                 |
|---------------------------------|-----------|-------------------------------------------------|
| bond                            | $r_0$ (Å) | $K_r$ (kcal mol <sup>-1</sup> Å <sup>-2</sup> ) |
| NT-CA                           | 1.3190    | 477.0000                                        |
| NT-H                            | 0.9100    | 434.0000                                        |
| CT-NT                           | 1.4630    | 337.0000                                        |
| NT-CZ                           | 1.3530    | 488.0000                                        |
| CZ-ST                           | 1.6880    | 222.0000                                        |

| <b>Angle Bond Deformation</b> |                  |                                                        |
|-------------------------------|------------------|--------------------------------------------------------|
| Angle                         | $\theta_0$ (deg) | $K_\theta$ (kcal mol <sup>-1</sup> rad <sup>-2</sup> ) |
| CA-NA-CA                      | 123.2000         | 70.0000                                                |
| NA-CA-CA                      | 119.9000         | 70.0000                                                |
| CA-CA-NT                      | 120.0000         | 70.0000                                                |
| CA-NT-CT                      | 128.7000         | 80.0000                                                |
| CA-NT-H2                      | 119.0000         | 35.0000                                                |
| H2-NT-CT                      | 118.5500         | 35.0000                                                |
| NT-CT-CT                      | 111.1000         | 80.0000                                                |
| NT-CT-HC                      | 109.0000         | 35.0000                                                |
| CT-NT-CZ                      | 122.9000         | 50.0000                                                |
| NT-CZ-ST                      | 121.2500         | 35.0000                                                |
| NT-CZ-NT                      | 119.3730         | 60.0000                                                |
| CZ-NT-H2                      | 118.5500         | 35.0000                                                |
| CT-NT-CT                      | 114.8000         | 70.0000                                                |
| CT-N2-H2                      | 118.5500         | 35.0000                                                |
| CA-CA-N2                      | 120.0000         | 70.0000                                                |

Table S4, contd.

| Torsional Deformation |         |                |
|-----------------------|---------|----------------|
| torsional angle       | $V_2$   | $\phi_0$ (deg) |
| CA-CA-NT-CT           | 16.0000 | 180.0          |
| CA-CA-CA-CA           | 10.0000 | 180.0          |
| CA-CA-CA-HC           | 10.0000 | 180.0          |
| CA-CA-NT-H            | 0.0000  | 180.0          |
| CA-NT-CT-CT           | 0.0000  | 180.0          |
| CA-NT-CT-HC           | 0.0000  | 180.0          |
| H2-NT-CT-CT           | 0.0000  | 180.0          |
| H2-NT-CT-HC           | 0.0000  | 180.0          |
| CT-CT-NT-CZ           | 0.0000  | 180.0          |
| CT-CT-NT-CT           | 0.0000  | 180.0          |
| HC-CT-NT-CZ           | 0.0000  | 180.0          |
| CT-NT-CZ-ST           | 10.0000 | 180.0          |
| CT-NT-CZ-NT           | 10.0000 | 180.0          |
| CT-NT-CT-HC           | 0.0000  | 180.0          |
| NT-CZ-NT-H2           | 0.0000  | 180.0          |
| ST-CZ-NT-H2           | 10.0000 | 180.0          |
| NT-CA-CA-CA           | 10.0000 | 180.0          |

| Improper Torsional Deformation |                |     |                                    |
|--------------------------------|----------------|-----|------------------------------------|
| improper angle                 | $\chi_0$ (deg) | $n$ | $K_\chi$ (kcal mol <sup>-1</sup> ) |
| H-NT-**-** <sup>a</sup>        | 3.0000         | 2   | 180.0000                           |
| **_NT-**-**                    | 4.0000         | 2   | 180.0000                           |
| CA-CA-CA-CA                    | 4.0000         | 2   | 180.0000                           |
| H-NT-CZ-CT                     | 0.0000         | 2   | 180.0000                           |
| HC-CA-CA-CA                    | 0.0000         | 2   | 180.0000                           |
| CZ-NT-CT-CT                    | 0.0000         | 2   | 180.0000                           |
| CA-CA-CA-N2                    | 0.0000         | 2   | 180.0000                           |
| ST-CZ-NT-NT                    | 7.0000         | 2   | 180.0000                           |
| **_CZ-**-**                    | 0.0000         | 2   | 180.0000                           |
| **_**-CA-HC                    | 4.0000         | 2   | 180.0000                           |

<sup>a</sup> \*\* Denotes any atom type.

| Nonbond Interaction |             |                         |
|---------------------|-------------|-------------------------|
| atom type           | $r_j^*$ (Å) | $\epsilon^*$ (kcal/mol) |
| CZ                  | 3.2000      | 0.10000                 |
| ST                  | 4.0000      | 0.20000                 |

Table S4, contd.

## Partial Charges for ACRAMTU

| atom no. in<br>pdb file | atom type | charge (e) |
|-------------------------|-----------|------------|
| C1                      | CT        | 0.082      |
| H11                     | HC        | 0.065      |
| H12                     | HC        | 0.066      |
| H13                     | HC        | 0.065      |
| C1                      | CZ        | 0.460      |
| S2                      | ST        | -0.807     |
| N3                      | NT        | -0.399     |
| H3                      | H2        | 0.278      |
| C1                      | CT        | 0.120      |
| H11                     | HC        | 0.073      |
| H12                     | HC        | 0.073      |
| C2                      | CT        | 0.130      |
| H21                     | HC        | 0.076      |
| H22                     | HC        | 0.073      |
| C1                      | CA        | -0.048     |
| C2                      | CA        | -0.027     |
| C3                      | CA        | -0.073     |
| C4                      | CA        | -0.020     |
| C4A                     | CA        | 0.057      |
| C9A                     | CA        | 0.234      |
| C10                     | CA        | 0.324      |
| C10A                    | CA        | 0.058      |
| C8A                     | CA        | 0.236      |
| N9                      | NA        | -0.344     |
| C5                      | CA        | -0.021     |
| C6                      | CA        | -0.076     |
| C7                      | CA        | -0.026     |
| C8                      | CA        | -0.051     |
| H1                      | HC        | 0.055      |
| H2                      | HC        | 0.051      |
| H3                      | HC        | 0.044      |
| H4                      | HC        | 0.055      |
| H5                      | HC        | 0.060      |
| H6                      | HC        | 0.044      |
| H7                      | HC        | 0.051      |
| H8                      | HC        | 0.055      |
| H9                      | HC        | 0.260      |
| N1                      | N2        | -0.426     |
| H1                      | H2        | 0.274      |
| N1                      | NT        | -0.371     |
| C1                      | CT        | 0.079      |
| H11                     | HC        | 0.066      |
| H12                     | HC        | 0.065      |
| H13                     | HC        | 0.065      |
